# Supplementary material for: A bromine-catalysis-synthesized poly(3,4-ethylenedioxythiophene)/graphitic carbon nitride electrochemical sensor for heavy metal ion determination
Source: Royal Society of Chemistry journal article supplement (doi:10.1039/c9ra02161b), 2019-01-01
Supplement: c9ra02161b1.pdf [file c9ra02161b1.pdf]

**Supporting Information for:**

**A Bromine-Catalysis-Synthesized Poly(3,4-  
ethelenedioxythiophene) /Graphitic Carbon Nitride  
Electrochemical Sensor for Heavy Metal Ion Determination**

Wei Wu<sup>ab</sup>, Ahmat Ali<sup>ab</sup>, Ruxangul Jamal<sup>\*ab</sup>, Mihray Abdulla<sup>ab</sup>, Tursunnisahan Bakri<sup>ab</sup> and Tursun Abdiryim<sup>\*ab</sup>

<sup>a</sup> Key Laboratory of Petroleum and Gas Fine Chemicals, Educational Ministry of  
China, School of Chemistry and Chemical Engineering, Xinjiang University, Urumqi  
830046, People's Republic of China

<sup>b</sup> Key Laboratory of Functional Polymers, Xinjiang University, Urumqi 830046,  
People's Republic of China

\* Corresponding author: Tel.: +86 09918582809 fax: +86 09918582809

E-mail: [tursunabdir@sina.com.cn](mailto:tursunabdir@sina.com.cn); [jruxangul@xju.edu.cn](mailto:jruxangul@xju.edu.cn)

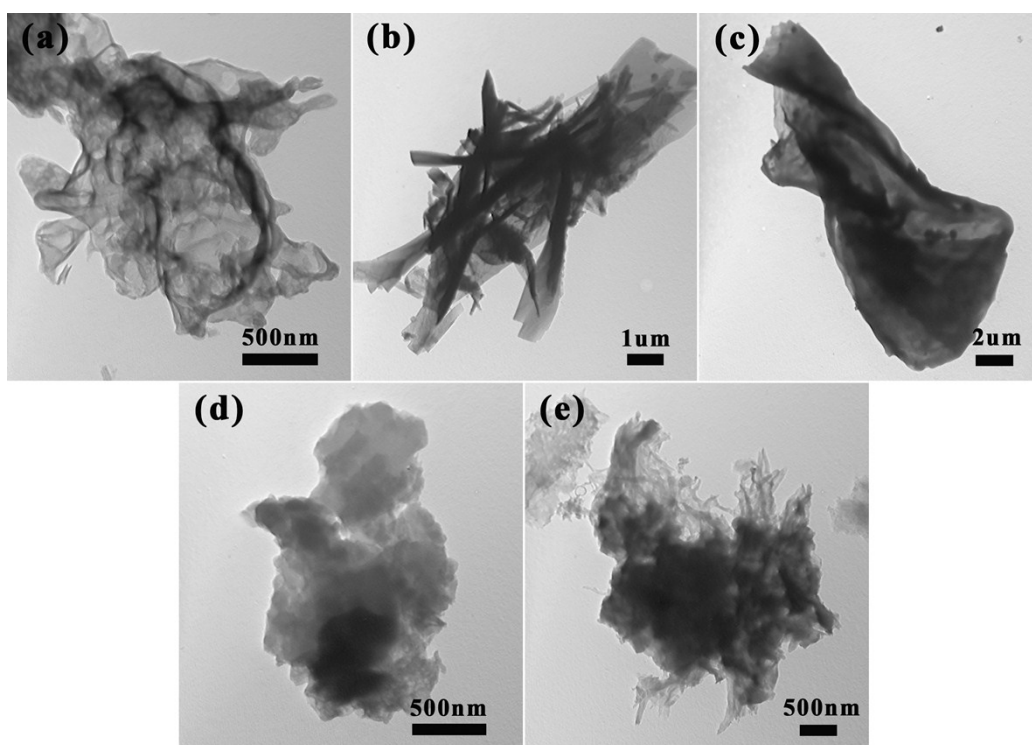

**Fig. S1.** TEM images of (a)  $g\text{-C}_3\text{N}_4$  (b) PEDOT (BCP), (c) PEDOT/10wt% $g\text{-C}_3\text{N}_4$  (BCP), (d) PEDOT/10wt% $g\text{-C}_3\text{N}_4$  (SSP), (e) PEDOT/10wt% $g\text{-C}_3\text{N}_4$  (MOP).

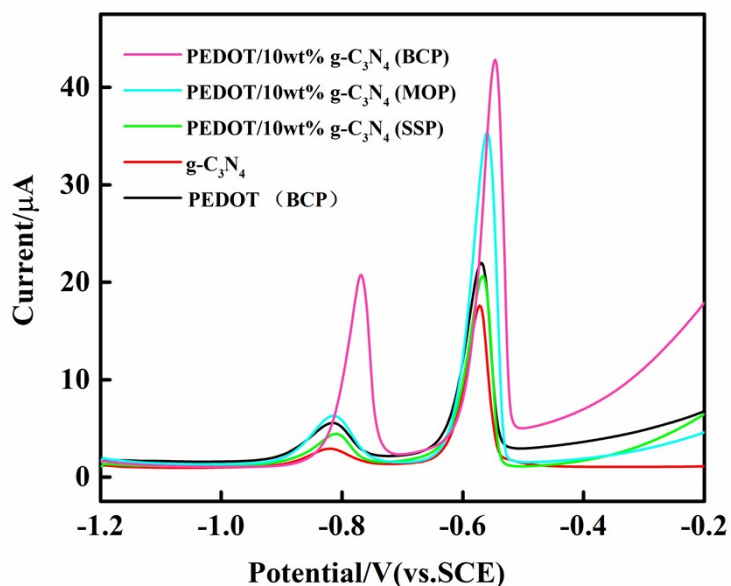

**Fig.S2.** DPV of PEDOT (BCP),  $g\text{-C}_3\text{N}_4$ , PEDOT/10wt% $g\text{-C}_3\text{N}_4$  (BCP, SSP, MOP) composite-modified GCE in 0.1M ABS (pH = 4.5) containing  $2\mu\text{M}$  of  $\text{Cd}^{2+}$  and  $\text{Pb}^{2+}$ . Deposition potential: -1.2V, deposition time: 180s, pulse width: 50ms; pulse period: 100ms; increment potential: 2mV.

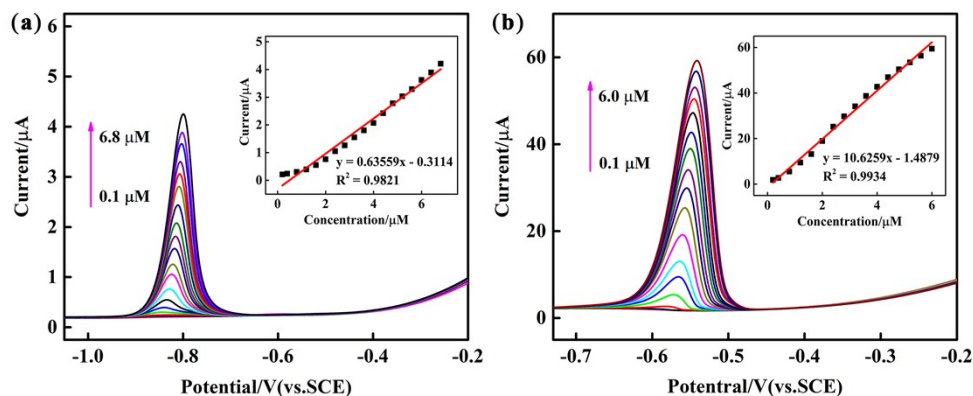

**Fig.S3.** DPV response of the PEDOT/10wt%g-C<sub>3</sub>N<sub>4</sub> (SSP) composite-modified GCE for the individual analysis of (a) Cd<sup>2+</sup> (b) Pb<sup>2+</sup>. The inset shows their linear equations as well as correlation coefficient.

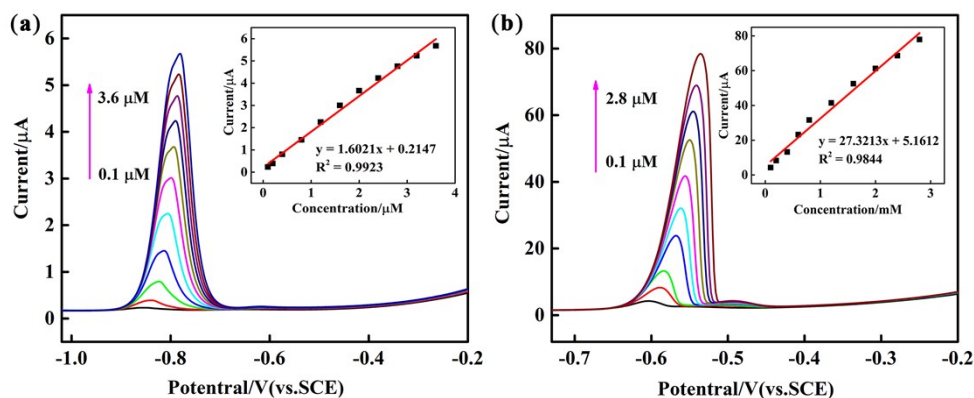

**Fig.S4.** DPV response of the PEDOT/10wt%g-C<sub>3</sub>N<sub>4</sub> (MOP) composite-modified GCE for the individual analysis of (a) Cd<sup>2+</sup> (b) Pb<sup>2+</sup>. The inset shows their linear equations as well as correlation coefficient.

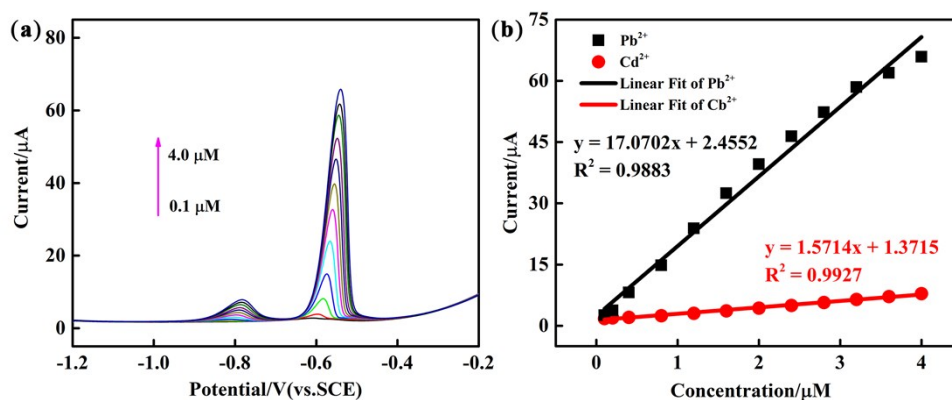

**Fig.S5.** DPV response of the PEDOT/10wt%g-C<sub>3</sub>N<sub>4</sub> (SSP) composite-modified GCE for the simultaneous analysis of Cd<sup>2+</sup> and Pb<sup>2+</sup> (b) the respective calibration curves of Cd<sup>2+</sup> and Pb<sup>2+</sup>.

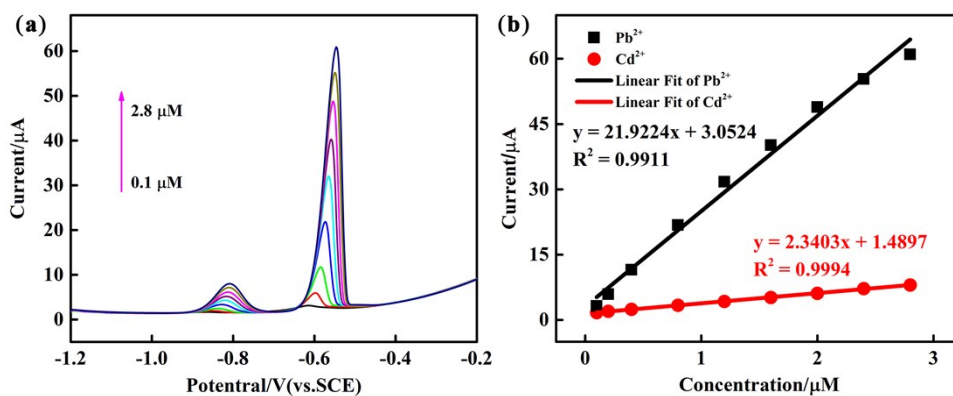

**Fig.S6.** (a) DPV response of the PEDOT/10wt%g-C<sub>3</sub>N<sub>4</sub> (MOP) composite-modified GCE for the simultaneous analysis of Cd<sup>2+</sup> and Pb<sup>2+</sup> (b) the respective calibration curves of Cd<sup>2+</sup> and Pb<sup>2+</sup>.
